CORRECTION

# Correction: Local and global limits on visual processing in schizophrenia

The *PLOS ONE* Staff

An affiliation for the sixth author is missing. Steven Dakin is affiliated with: Institute of Ophthalmology, University College London and the Department of Optometry & Vision Science, University of Auckland, Private Bag 92019, Auckland 1142, New Zealand.

## Reference

1. Tibber MS, Anderson EJ, Bobin T, Carlin P, Shergill SS, Dakin S (2015) Local and Global Limits on Visual Processing in Schizophrenia. *PLoS ONE* 10(2): e0117951. doi: [10.1371/journal.pone.0117951](https://doi.org/10.1371/journal.pone.0117951) PMID: [25689281](https://pubmed.ncbi.nlm.nih.gov/25689281/)

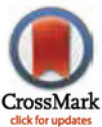

## OPEN ACCESS

**Citation:** The *PLOS ONE* Staff (2015) Correction: Local and global limits on visual processing in schizophrenia. *PLoS ONE* 10(3): e0123801. doi:10.1371/journal.pone.0123801

**Published:** March 30, 2015

**Copyright:** © 2015 The PLOS ONE Staff. This is an open access article distributed under the terms of the [Creative Commons Attribution License](https://creativecommons.org/licenses/by/4.0/), which permits unrestricted use, distribution, and reproduction in any medium, provided the original author and source are credited.
